# Supplementary material for: Current understanding of children’s head shape and its impact on health: a cross-sectional study among pediatric medical staff in China
Source: PubMed Central journal article supplement — Transl Pediatr. 2024 Feb 21;13(2):203–11. doi: 10.21037/tp-23-396 (PMC10915442; doi:10.21037/tp-23-396), 2024-02-21
Supplement: tp-13-02-203-supplementary.pdf [file tp-13-02-203-supplementary.pdf]

**Table S1** Association between respondent characteristics and perceptions of head shape questions.

| Question and response                                                     | Hospital grade                 |                                     |                                |
|---------------------------------------------------------------------------|--------------------------------|-------------------------------------|--------------------------------|
|                                                                           | Primary hospital (n=17), n (%) | Intermediate hospital (n=96), n (%) | Senior hospital (n=101), n (%) |
| Do you have knowledge of flat head syndrome?                              |                                |                                     |                                |
| Not at all                                                                | 8 (47.1)                       | 16 (16.7)                           | 12 (11.9)                      |
| Somewhat familiar                                                         | 9 (52.9)                       | 72 (75.0)                           | 74 (73.3)                      |
| Very familiar                                                             | 0 (0)                          | 8 (8.3)                             | 15 (14.8)                      |
| Do you have knowledge of plagiocephaly?                                   |                                |                                     |                                |
| Not at all                                                                | 7 (41.1)                       | 17 (17.7)                           | 12 (11.9)                      |
| Somewhat familiar                                                         | 9 (52.9)                       | 71 (74.0)                           | 71 (70.3)                      |
| Very familiar                                                             | 1 (5.8)                        | 8 (8.3)                             | 18 (17.8)                      |
| Do you have knowledge of craniosynostosis?                                |                                |                                     |                                |
| Not at all                                                                | 2 (11.7)                       | 8 (8.3)                             | 5 (4.9)                        |
| Somewhat familiar                                                         | 12 (70.7)                      | 72 (75.0)                           | 66 (65.4)                      |
| Very familiar                                                             | 3 (17.6)                       | 16 (16.7)                           | 30 (29.7)                      |
| Do you have knowledge of the high-risk groups for abnormal head shape?    |                                |                                     |                                |
| Not at all                                                                | 6 (35.3)                       | 24 (25.0)                           | 21 (20.8)                      |
| Somewhat familiar                                                         | 11 (64.7)                      | 62 (64.6)                           | 71 (70.3)                      |
| Very familiar                                                             | 0 (0)                          | 10 (10.4)                           | 9 (8.9)                        |
| Do you know which head shapes are problematic?                            |                                |                                     |                                |
| Not at all                                                                | 3 (17.6)                       | 1 (1.0)                             | 5 (4.9)                        |
| Somewhat familiar                                                         | 14 (82.4)                      | 83 (86.5)                           | 79 (78.2)                      |
| Very familiar                                                             | 0 (0)                          | 12 (12.5)                           | 17 (16.8)                      |
| Do you know the consequences of craniosynostosis?                         |                                |                                     |                                |
| Not at all                                                                | 2 (11.8)                       | 9 (9.4)                             | 9 (8.9)                        |
| Somewhat familiar                                                         | 12 (70.6)                      | 74 (77.1)                           | 65 (64.4)                      |
| Very familiar                                                             | 3 (17.6)                       | 13 (13.5)                           | 27 (26.7)                      |
| Do you know the best time for the intervention of problematic head shape? |                                |                                     |                                |
| Yes                                                                       | 7 (41.2)                       | 51 (53.1)                           | 56 (55.4)                      |
| No                                                                        | 10 (58.8)                      | 45 (46.9)                           | 45 (44.6)                      |
| Do you know the interventions for problematic head shapes?                |                                |                                     |                                |
| Yes                                                                       | 12 (70.6)                      | 66 (68.8)                           | 84 (83.2)                      |
| No                                                                        | 5 (29.4)                       | 30 (31.2)                           | 17 (16.8)                      |
| Is head shape routinely measured in your practice?                        |                                |                                     |                                |
| Yes                                                                       | 9 (52.9)                       | 73 (76.0)                           | 79 (78.2)                      |
| No                                                                        | 8 (47.1)                       | 23 (24.0)                           | 22 (21.8)                      |

Table S1 (continued)

**Table S1** (continued)

| Question and response                                                                                     | Hospital grade                 |                                     |                                |
|-----------------------------------------------------------------------------------------------------------|--------------------------------|-------------------------------------|--------------------------------|
|                                                                                                           | Primary hospital (n=17), n (%) | Intermediate hospital (n=96), n (%) | Senior hospital (n=101), n (%) |
| Is the measurement of children's head shape necessary?                                                    |                                |                                     |                                |
| Yes                                                                                                       | 17 (100.0)                     | 94 (97.9)                           | 101 (100.0)                    |
| No                                                                                                        | 0 (0)                          | 2 (2.1)                             | 0 (0)                          |
| Mean                                                                                                      | 1                              | 0.98                                | 1                              |
| Should advice be given or intervention be performed for abnormal head shape?                              |                                |                                     |                                |
| Yes                                                                                                       | 10 (58.8)                      | 74 (77.1)                           | 84 (83.2)                      |
| No                                                                                                        | 7 (41.2)                       | 22 (22.9)                           | 17 (16.8)                      |
| For patients who require referral, is there an established medical facility that one could refer them to? |                                |                                     |                                |
| Yes                                                                                                       | 7 (41.2)                       | 55 (57.3)                           | 57 (56.4)                      |
| No                                                                                                        | 10 (58.8)                      | 41 (42.7)                           | 44 (43.6)                      |
| Is it necessary to learn more about head shape abnormalities?                                             |                                |                                     |                                |
| Yes                                                                                                       | 16 (94.1)                      | 91 (94.8)                           | 94 (93.1)                      |
| No                                                                                                        | 1 (5.9)                        | 5 (5.2)                             | 7 (6.9)                        |
| Have you ever received an inquiry about head shape?                                                       |                                |                                     |                                |
| Yes                                                                                                       | 12 (70.6)                      | 90 (93.8)                           | 93 (92.1)                      |
| No                                                                                                        | 5 (29.4)                       | 6 (6.2)                             | 8 (7.9)                        |
